# Supplementary material for: Smoking intensity and duration is associated with cardiac structure and function: the ECHOcardiographic Study of Hispanics/Latinos
Source: PubMed Central journal article supplement — Open Heart. 2017 Jun 14;4(2):e000614. doi: 10.1136/openhrt-2017-000614 (PMC5515129; doi:10.1136/openhrt-2017-000614), 2017-06-14
Supplement: openhrt-2017-000614supp001.pdf [file openhrt-2017-000614supp001.pdf]

Smoking Intensity and Duration is Associated with Cardiac Structure and Function

Supplemental Table A – Multivariate analysis of different measures of tobacco usage, Diabetes Only

| Variable                                        | Age at Initiation    |                  | Cigarettes per day   |                  | Lifetime Pack-Years  |                  |
|-------------------------------------------------|----------------------|------------------|----------------------|------------------|----------------------|------------------|
|                                                 | Coefficient estimate | p-value          | Coefficient estimate | p-value          | Coefficient estimate | p-value          |
| <b>Left Ventricular Structure and Function</b>  |                      |                  |                      |                  |                      |                  |
| LV EDV, ml                                      | <b>0.18</b>          | <b>0.0001</b>    | <b>0.40</b>          | <b>0.0001</b>    | <b>0.11</b>          | <b>0.002</b>     |
| LV ESV, ml                                      | -0.008               | 0.64             | <b>0.48</b>          | <b>&lt;.0001</b> | <b>0.16</b>          | <b>&lt;.0001</b> |
| LV EF, %                                        | <b>0.03</b>          | <b>&lt;.0001</b> | <b>-0.29</b>         | <b>&lt;.0001</b> | <b>-0.10</b>         | <b>&lt;.0001</b> |
| LVM, g                                          | <b>-1.41</b>         | <b>&lt;.0001</b> | <b>2.72</b>          | <b>&lt;.0001</b> | <b>1.14</b>          | <b>&lt;.0001</b> |
| RVAd, cm <sup>2</sup>                           | <b>0.05</b>          | <b>&lt;.0001</b> | -0.004               | 0.82             | <b>-0.01</b>         | <b>0.0006</b>    |
| RWT                                             | <b>-0.001</b>        | <b>&lt;.0001</b> | <b>0.004</b>         | <b>&lt;.0001</b> | <b>0.002</b>         | <b>&lt;.0001</b> |
| E/e'                                            | <b>0.06</b>          | <b>&lt;.0001</b> | <b>-0.01</b>         | <b>0.002</b>     | <b>-0.006</b>        | <b>0.004</b>     |
| <b>Right Ventricular Structure and Function</b> |                      |                  |                      |                  |                      |                  |
| RV FAC                                          | <b>-0.003</b>        | <b>&lt;.0001</b> | -0.0004              | 0.59             | <b>0.0006</b>        | <b>&lt;.0001</b> |
| TAPSE, cm                                       | <b>-0.006</b>        | <b>&lt;.0001</b> | <b>-0.01</b>         | <b>&lt;.0001</b> | <b>-0.002</b>        | <b>0.0003</b>    |
| RV peak S                                       | <b>-0.01</b>         | <b>0.001</b>     | <b>-0.06</b>         | <b>&lt;.0001</b> | <b>-0.008</b>        | <b>0.002</b>     |
| RVOT VTI, cm                                    | <b>0.09</b>          | <b>&lt;.0001</b> | 0.05                 | 0.03             | -0.006               | 0.28             |
| RV SV, mL                                       | <b>0.49</b>          | <b>&lt;.0001</b> | <b>-0.65</b>         | <b>0.002</b>     | <b>-0.31</b>         | <b>&lt;.0001</b> |
| TR max PG, mmHg                                 | <b>0.05</b>          | <b>&lt;.0001</b> | 0.06                 | 0.07             | <b>-0.04</b>         | <b>0.002</b>     |
| TR max velocity, cm/s                           | <b>0.48</b>          | <b>&lt;.0001</b> | <b>0.69</b>          | <b>0.001</b>     | -0.12                | 0.05             |

Adjusted for age, sex

Supplemental Table B – Multivariate analysis of different measures of tobacco usage, Hypertension Only

| Variable                                        | Age at Initiation    |                  | Cigarettes per day   |                  | Lifetime Pack-Years  |                  |
|-------------------------------------------------|----------------------|------------------|----------------------|------------------|----------------------|------------------|
|                                                 | Coefficient estimate | p-value          | Coefficient estimate | p-value          | Coefficient estimate | p-value          |
| <b>Left Ventricular Structure and Function</b>  |                      |                  |                      |                  |                      |                  |
| LV EDV, ml                                      | 0.13                 | 0.32             | <b>-0.22</b>         | <b>&lt;.0001</b> | <b>-0.11</b>         | <b>&lt;.0001</b> |
| LV ESV, ml                                      | -0.02                | 0.79             | <b>-0.16</b>         | <b>&lt;.0001</b> | <b>-0.05</b>         | <b>&lt;.0001</b> |
| LV EF, %                                        | <b>0.16</b>          | <b>0.0003</b>    | 0.04                 | 0.26             | 0.008                | 0.11             |
| LVM, g                                          | 0.05                 | 0.90             | <b>-0.94</b>         | <b>&lt;.0001</b> | <b>0.25</b>          | <b>&lt;.0001</b> |
| RVAd, cm <sup>2</sup>                           | -0.05                | 0.08             | -0.002               | 0.81             | <b>0.016</b>         | <b>&lt;.0001</b> |
| RWT                                             | <b>0.002</b>         | <b>0.004</b>     | <b>0.002</b>         | <b>&lt;.0001</b> | <b>0.0006</b>        | <b>&lt;.0001</b> |
| E/e'                                            | 0.07                 | 0.02             | <b>-0.03</b>         | <b>0.002</b>     | -0.003               | 0.09             |
| <b>Right Ventricular Structure and Function</b> |                      |                  |                      |                  |                      |                  |
| RV FAC                                          | 0.002                | 0.08             | <b>-0.001</b>        | <b>0.009</b>     | <b>-0.001</b>        | <b>&lt;.0001</b> |
| TAPSE, cm                                       | 0.004                | 0.05             | 0.0003               | 0.86             | <b>-0.003</b>        | <b>&lt;.0001</b> |
| RV peak S                                       | -0.009               | 0.66             | <b>0.04</b>          | <b>&lt;.0001</b> | <b>-0.02</b>         | <b>&lt;.0001</b> |
| RVOT VTI, cm                                    | <b>0.17</b>          | <b>&lt;.0001</b> | <b>-0.10</b>         | <b>&lt;.0001</b> | <b>-0.03</b>         | <b>&lt;.0001</b> |
| RV SV, mL                                       | 0.34                 | 0.08             | <b>-0.61</b>         | <b>&lt;.0001</b> | -0.02                | 0.38             |
| TR max PG, mmHg                                 | 0.13                 | 0.03             | <b>0.09</b>          | <b>0.001</b>     | <b>-0.04</b>         | <b>&lt;.0001</b> |
| TR max velocity, cm/s                           | 0.83                 | 0.03             | <b>0.68</b>          | <b>&lt;.0001</b> | <b>-0.18</b>         | <b>0.001</b>     |

Adjusted for age, sex

## Smoking Intensity and Duration is Associated with Cardiac Structure and Function

Supplemental Table C – Multivariate analysis of different measures of tobacco usage, No diabetes, hypertension or obesity only

| Variable                                        | Age at Initiation    |              | Cigarettes per day   |                  | Lifetime Pack-Years  |                  |
|-------------------------------------------------|----------------------|--------------|----------------------|------------------|----------------------|------------------|
|                                                 | Coefficient estimate | p-value      | Coefficient estimate | p-value          | Coefficient estimate | p-value          |
| <b>Left Ventricular Structure and Function</b>  |                      |              |                      |                  |                      |                  |
| LV EDV, ml                                      | -0.19                | 0.13         | <b>-0.23</b>         | <b>0.003</b>     | <b>-0.12</b>         | <b>0.003</b>     |
| LV ESV, ml                                      | -0.13                | 0.13         | <b>-0.10</b>         | <b>0.0007</b>    | <b>-0.06</b>         | <b>0.001</b>     |
| LV EF, %                                        | 0.05                 | 0.24         | 0.05                 | 0.16             | -0.01                | 0.07             |
| LVM, g                                          | -0.28                | 0.32         | <b>2.11</b>          | <b>&lt;.0001</b> | <b>0.51</b>          | <b>&lt;.0001</b> |
| RVAd, cm <sup>2</sup>                           | 0.03                 | 0.11         | 0.008                | 0.55             | -0.02                | 0.02             |
| RWT                                             | -0.0004              | 0.67         | <b>0.004</b>         | <b>&lt;.0001</b> | <b>0.001</b>         | <b>&lt;.0001</b> |
| E/e'                                            | <b>0.10</b>          | <b>0.002</b> | <b>0.22</b>          | <b>&lt;.0001</b> | <b>0.05</b>          | <b>&lt;.0001</b> |
| <b>Right Ventricular Structure and Function</b> |                      |              |                      |                  |                      |                  |
| RV FAC                                          | -0.003               | 0.011        | -0.0006              | 0.38             | -0.0004              | 0.02             |
| TAPSE, cm                                       | <b>0.01</b>          | <b>0.009</b> | <b>0.01</b>          | <b>0.0009</b>    | -0.0002              | 0.85             |
| RV peak S                                       | 0.02                 | 0.39         | <b>0.06</b>          | <b>&lt;.0001</b> | -0.006               | 0.08             |
| RVOT VTI, cm                                    | 0.05                 | 0.05         | -0.0005              | 0.97             | <b>-0.01</b>         | <b>0.007</b>     |
| RV SV, mL                                       | <b>0.57</b>          | <b>0.01</b>  | <b>-0.44</b>         | <b>0.0002</b>    | -0.11                | 0.02             |
| TR max PG, mmHg                                 | <b>0.21</b>          | <b>0.009</b> | <b>0.20</b>          | <b>0.0005</b>    | -0.01                | 0.28             |
| TR max velocity, cm/s                           | <b>1.46</b>          | <b>0.006</b> | <b>1.19</b>          | <b>0.001</b>     | -0.02                | 0.71             |

Adjusted for age, sex

Stratified analysis was performed based on three classifications: for diabetes only (n=27) excluding cases with hypertension, for hypertension only (n=82) excluding cases with diabetes, and healthy cases (n=96) exclude any diabetes, hypertension or obesity.
